# Supplementary material
Source: PubMed Central journal article supplement (PMC4965276)

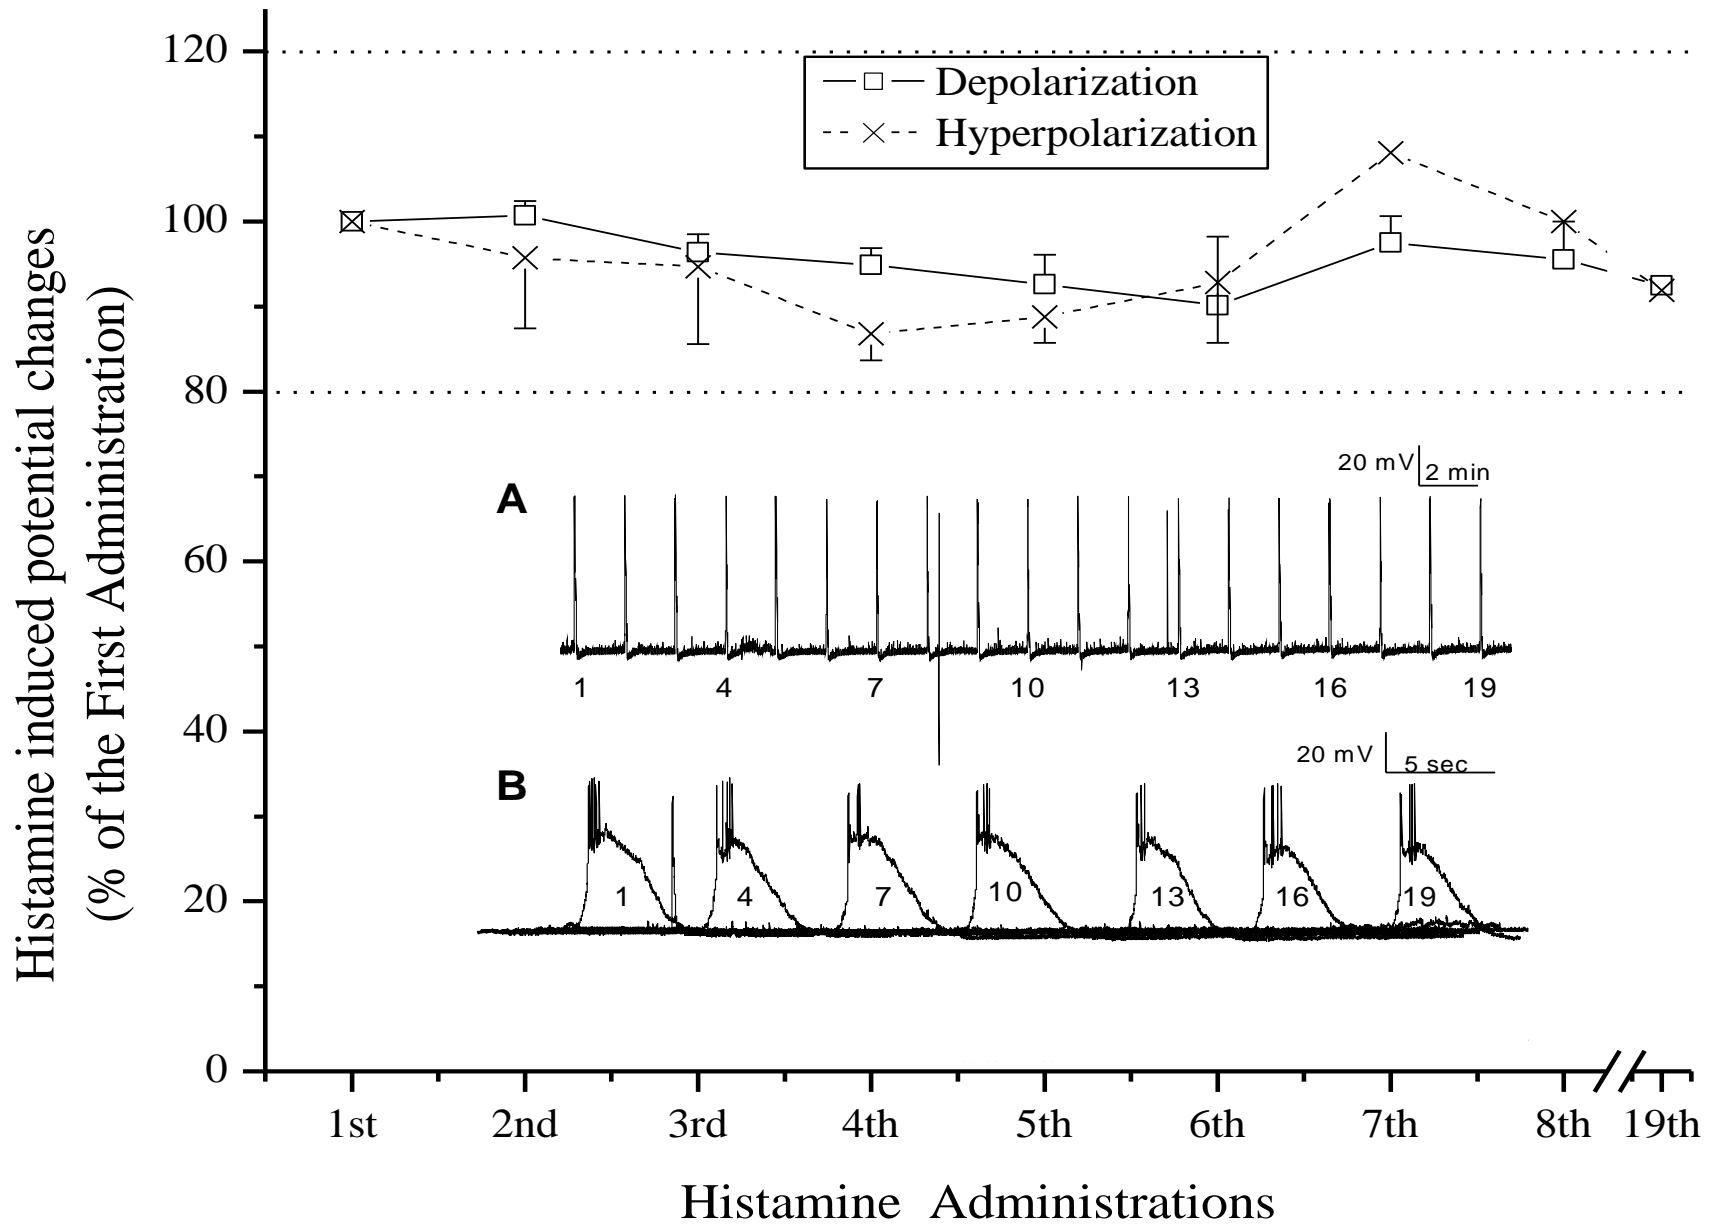

Supplement: NIHMS774035-supplement-1.pdf [file NIHMS774035-supplement-1.pdf]
